# Supplementary material for: Long-Term Sustainability Implications of Diverse Commercial Pollinator Mixtures for the Conservation Reserve Program
Source: MDPI journal article supplement (doi:10.3390/agronomy12030549), 2022-02-23
Supplement: s1 [file s1]

Supplementary Table S1. Commercial species mixtures and descriptions for Conservation Reserve Program plantings to promote pollinator habitat.

| <b>Mixture</b> | <b>Common Name</b>     | <b>Scientific Name</b>          | <b>Duration<sup>†</sup></b> | <b>Typical Bloom Color<sup>*</sup></b> |
|----------------|------------------------|---------------------------------|-----------------------------|----------------------------------------|
| Holland        | Purple coneflower      | <i>Echinacea purpurea</i>       | HP                          | Purplish K                             |
|                | White evening primrose | <i>Oenothera speciosa</i>       | HP                          | Rosy K                                 |
|                | Lanceleaf coreopsis    | <i>Coreopsis lanceolata</i>     | HP                          | Y                                      |
|                | Baby blue eyes         | <i>Nemophila menziesii</i>      | A                           | B                                      |
|                | Yarrow                 | <i>Achillea millefolium</i>     | HP                          | W                                      |
|                | Mexican hat plant      | <i>Ratibida columnifera</i>     | HP                          | Y                                      |
|                | Black-eyed Susan       | <i>Rudbeckia hirta</i>          | HP                          | Y                                      |
|                | Beggar ticks           | <i>Bidens aristata</i>          | A                           | Y                                      |
|                | Partridge pea          | <i>Chamaecrista fasciculata</i> | A                           | Y                                      |
|                | Goldenrod              | <i>Solidago rigida</i>          | HP                          | Y                                      |
|                |                        |                                 |                             |                                        |
| Hamilton       | Plains Coreopsis       | <i>Coreopsis tinctoria</i>      | A                           | Y and R                                |
|                | Black-eyed Susan       | <i>Rudbeckia hirta</i>          | HP                          | Y                                      |
|                | Lespedeza              | <i>Lespedeza thunbergii</i>     | DS                          | P                                      |
|                | Lance Coreopsis        | <i>Coreopsis lanceolata</i>     | HP                          | Y                                      |
|                | Rattlesnake master     | <i>Eryngium yuccifolium</i>     | HP                          | W                                      |
|                | Sampson's snakeroot    | <i>Orbexilum pedunculatum</i>   | HP                          | P                                      |
|                | Beardtounge            | <i>Penstemon digitalis</i>      | HP                          | W                                      |
|                | Slender mountain mint  | <i>Pycnanthemum tenuifolium</i> | HP                          | W                                      |
|                | Tickseed sunflower     | <i>Bidens polylepis</i>         | A                           | Y                                      |
|                | Lead plant             | <i>Amorpha canescens</i>        | DS                          | P or B                                 |
|                | Purple coneflower      | <i>Echinacea purpurea</i>       | HP                          | Purplish K                             |
|                | Prairie white clover   | <i>Dalea candida</i>            | HP                          | W                                      |
|                | Goldenrod              | <i>Solidago rigida</i>          | HP                          | Y                                      |
|                | Wild bergamot          | <i>Monarda fistulosa</i>        | HP                          | K                                      |
|                |                        |                                 |                             |                                        |
| Bamert         | Bachelor button        | <i>Centaurea cyanus</i>         | A                           | B                                      |
|                | California Poppy       | <i>Eschscholzia californica</i> | HP                          | O to Y                                 |
|                | B Flax                 | <i>Linum perenne</i>            | A                           | W to B                                 |
|                | Annual Lupine          | <i>Lupinus succulentus</i>      | A                           | B to P                                 |
|                | Baby's breath          | <i>Gypsophila paniculata</i>    | HP                          | W                                      |
|                | Lance Coreopsis        | <i>Coreopsis lanceolata</i>     | HP                          | Y                                      |
|                | Cosmos                 | <i>Cosmos bipinnatus</i>        | A                           | R to K                                 |
|                | Chinese forget-me-not  | <i>Cynoglossum amabile</i>      | HP                          | Light B                                |
|                | Sweet Alyssum          | <i>Lobularia maritima</i>       | HP                          | W                                      |
|                | Scarlet Flax           | <i>Linum grandiflorum</i>       | A                           | R                                      |
|                | Sweet William          | <i>Dianthus barbatus</i>        | HP                          | R to K                                 |
|                | Indian Blanket         | <i>Gaillardia pulchella</i>     | A                           | R and Y                                |
|                | Clarkia                | <i>Clarkia amoena</i>           | A                           | R to K                                 |
|                | Mallow                 | <i>Callirhoe involucrata</i>    | HP                          | Magenta                                |
|                | Purple Coneflower      | <i>Echinacea purpurea</i>       | HP                          | Purplish K                             |
|                | Plains Coreopsis       | <i>Coreopsis tinctoria</i>      | A                           | Y and R                                |

<sup>†</sup>HP=herbaceous perennial; A=annual; DS=deciduous shrub; P=perennial

<sup>\*</sup>K=pink; Y=yellow; B=blue; R=red; W=white; P=purple; O=orange

Supplementary Table S1 continued.

| <b>Mixture</b> | <b>Common Name</b> | <b>Scientific Name</b>                | <b>Duration<sup>†</sup></b> | <b>Typical Bloom Color<sup>*</sup></b> |
|----------------|--------------------|---------------------------------------|-----------------------------|----------------------------------------|
| Bamert         | Rocket Larkspur    | <i>Consolida ajacis</i>               | A                           | B, K, or W                             |
|                | African Daisy      | <i>Osteospermum</i>                   | HP                          | W-K and Y                              |
|                | Corn Poppy         | <i>Papaver rhoeas</i>                 | A                           | R                                      |
|                | Mexican hat plant  | <i>Ratibida columnifera</i>           | HP                          | Y                                      |
|                | Money plant        | <i>Lunaria annua</i>                  | HP                          | P                                      |
|                | Shasta daisy       | <i>Leucanthemum</i> × <i>superbum</i> | HP                          | W and Y                                |
|                | Black-eyed Susan   | <i>Rudbeckia hirta</i>                | HP                          | Y                                      |
|                | Columbine          | <i>Aquilegia canadensis</i>           | HP                          | K or Y                                 |
|                | Yarrow             | <i>Achillea millefolium</i>           | HP                          | W                                      |
|                | Strawflower        | <i>Xerochrysum bracteatum</i>         | A                           | Y, O, R, K, W                          |
|                | Spiked Gayfeather  | <i>Liatris pycnostachya</i>           | P                           | P                                      |

<sup>†</sup>HP=herbaceous perennial; A=annual; P=perennial

<sup>\*</sup>K=pink; Y=yellow; B=blue; R=red; W=white; P=purple; O=orange
